# Supplementary material for: Genetic silencing of olivocerebellar synapses causes dystonia-like behaviour in mice
Source: PubMed Central journal article supplement (PMC5382291; doi:10.1038/ncomms14912), 2017-04-04
Supplement: ncomms14912-s1.pdf [file ncomms14912-s1.pdf]

| <b>Table 1</b>                     | Genotype                                                     | Quantification                                   | <i>n</i>              | <i>p</i> -value           | Related Figure        |
|------------------------------------|--------------------------------------------------------------|--------------------------------------------------|-----------------------|---------------------------|-----------------------|
| VGLUT2 ML puncta                   | <i>Vglut2</i> <sup>fx/fx</sup>                               | 163 ± 7.74/10 <sup>4</sup> μm <sup>2</sup>       | 4 mice                | 9.294 × 10 <sup>-16</sup> | Fig. 1f               |
|                                    | <i>Ptfla</i> <sup>Cre</sup> ; <i>Vglut2</i> <sup>fx/fx</sup> | 14 ± 2.1/10 <sup>4</sup> μm <sup>2</sup>         | 4 mice                |                           |                       |
| VGLUT2 mossy fiber terminals       | <i>Vglut2</i> <sup>fx/fx</sup>                               | 112 ± 6.6/10 <sup>4</sup> μm <sup>2</sup>        | 4 mice                | 0.705                     | Fig. 1g               |
|                                    | <i>Ptfla</i> <sup>Cre</sup> ; <i>Vglut2</i> <sup>fx/fx</sup> | 114 ± 18.10/10 <sup>4</sup> μm <sup>2</sup>      | 4 mice                |                           |                       |
| VGLUT1 intensity                   | <i>Vglut2</i> <sup>fx/fx</sup>                               | 54 ± 3.57                                        | 4 mice                | 0.594                     | Supplementary Fig. 3a |
|                                    | <i>Ptfla</i> <sup>Cre</sup> ; <i>Vglut2</i> <sup>fx/fx</sup> | 57 ± 4.30                                        | 4 mice                |                           |                       |
| Rotarod time to fall (third day)   | <i>Vglut2</i> <sup>fx/fx</sup>                               | 236 ± 9.83 s                                     | 62 mice               | 1.746 × 10 <sup>-14</sup> | Fig. 3c               |
|                                    | <i>Ptfla</i> <sup>Cre</sup> ; <i>Vglut2</i> <sup>fx/fx</sup> | 80 ± 13.41 s                                     | 38 mice               |                           |                       |
| OFA total distance                 | <i>Vglut2</i> <sup>fx/fx</sup>                               | 3200 ± 249 cm                                    | 28 mice               | 9.62 × 10 <sup>-4</sup>   | Fig. 3e               |
|                                    | <i>Ptfla</i> <sup>Cre</sup> ; <i>Vglut2</i> <sup>fx/fx</sup> | 2100 ± 184 cm                                    | 29 mice               |                           |                       |
| OFA distance/activity count        | <i>Vglut2</i> <sup>fx/fx</sup>                               | 0.57 ± 0.02                                      | 28 mice               | 7.20 × 10 <sup>-6</sup>   | Fig. 3e               |
|                                    | <i>Ptfla</i> <sup>Cre</sup> ; <i>Vglut2</i> <sup>fx/fx</sup> | 0.39 ± 0.02                                      | 29 mice               |                           |                       |
| Tremor frequency                   | <i>Vglut2</i> <sup>fx/fx</sup>                               | 12.3 ± 0.708 Hz                                  | 139 mice              | 0.705                     | Fig. 3f               |
|                                    | <i>Ptfla</i> <sup>Cre</sup> ; <i>Vglut2</i> <sup>fx/fx</sup> | 11 ± 1.14 Hz                                     | 129 mice              |                           |                       |
| Tremor power                       | <i>Vglut2</i> <sup>fx/fx</sup>                               | 2.1 × 10 <sup>-4</sup> ± 2.92 × 10 <sup>-5</sup> | 139 mice              | 1.05 × 10 <sup>-6</sup>   | Fig. 3f               |
|                                    | <i>Ptfla</i> <sup>Cre</sup> ; <i>Vglut2</i> <sup>fx/fx</sup> | 5.6 × 10 <sup>-4</sup> ± 3.98 × 10 <sup>-5</sup> | 129 mice              |                           |                       |
| Juvenile anesthetized PC frequency | <i>Vglut2</i> <sup>fx/fx</sup>                               | 26 ± 4.95 Hz                                     | 7 cells from 2 mice   | 4.1 × 10 <sup>-2</sup>    | Fig. 4c               |
|                                    | <i>Ptfla</i> <sup>Cre</sup> ; <i>Vglut2</i> <sup>fx/fx</sup> | 15 ± 4.99 Hz                                     | 12 cells from 3 mice  |                           |                       |
| Juvenile anesthetized PC CV        | <i>Vglut2</i> <sup>fx/fx</sup>                               | 2.86 ± 3                                         | 7 cells from 2 mice   | 3.7 × 10 <sup>-3</sup>    | Fig. 4c               |
|                                    | <i>Ptfla</i> <sup>Cre</sup> ; <i>Vglut2</i> <sup>fx/fx</sup> | 0.443 ± 0.099                                    | 12 cells from 3 mice  |                           |                       |
| Juvenile anesthetized PC CV2       | <i>Vglut2</i> <sup>fx/fx</sup>                               | 0.46 ± 0.05                                      | 7 cells from 2 mice   | 0.593                     | Fig. 4c               |
|                                    | <i>Ptfla</i> <sup>Cre</sup> ; <i>Vglut2</i> <sup>fx/fx</sup> | 0.37 ± 0.08                                      | 12 cells from 3 mice  |                           |                       |
| Adult anesthetized PC frequency    | <i>Vglut2</i> <sup>fx/fx</sup>                               | 66 ± 4.5 Hz                                      | 27 cells from 8 mice  | 0.548                     | See text              |
|                                    | <i>Ptfla</i> <sup>Cre</sup> ; <i>Vglut2</i> <sup>fx/fx</sup> | 62 ± 5.4 Hz                                      | 45 cells from 14 mice |                           |                       |
| Adult anesthetized PC CV           | <i>Vglut2</i> <sup>fx/fx</sup>                               | 0.568 ± 0.049                                    | 27 cells from 8 mice  | 0.852                     | See text              |
|                                    | <i>Ptfla</i> <sup>Cre</sup> ; <i>Vglut2</i> <sup>fx/fx</sup> | 0.555 ± 0.051                                    | 45 cells from 14 mice |                           |                       |
| Adult anesthetized PC CV2          | <i>Vglut2</i> <sup>fx/fx</sup>                               | 0.44 ± 0.021                                     | 27 cells from 8 mice  | 0.751                     | See text              |
|                                    | <i>Ptfla</i> <sup>Cre</sup> ; <i>Vglut2</i> <sup>fx/fx</sup> | 0.45 ± 0.022                                     | 45 cells from 14 mice |                           |                       |
| Adult anesthetized MLIs frequency  | <i>Vglut2</i> <sup>fx/fx</sup>                               | 19.6 ± 2.99 Hz                                   | 11 cells from 5 mice  | 0.545                     | Supplementary Fig. 5c |
|                                    | <i>Ptfla</i> <sup>Cre</sup> ; <i>Vglut2</i> <sup>fx/fx</sup> | 17.3 ± 2.33 Hz                                   | 17 cells from 6 mice  |                           |                       |
| Adult anesthetized MLIs CV         | <i>Vglut2</i> <sup>fx/fx</sup>                               | 1.13 ± 0.279                                     | 11 cells from 5 mice  | 0.846                     | Supplementary Fig. 5c |
|                                    | <i>Ptfla</i> <sup>Cre</sup> ; <i>Vglut2</i> <sup>fx/fx</sup> | 1.07 ± 0.143                                     | 17 cells from 6 mice  |                           |                       |
| Adult anesthetized MLIs CV2        | <i>Vglut2</i> <sup>fx/fx</sup>                               | 0.565 ± 0.053                                    | 11 cells from 5 mice  | 0.376                     | Supplementary Fig. 5c |
|                                    | <i>Ptfla</i> <sup>Cre</sup> ; <i>Vglut2</i> <sup>fx/fx</sup> | 0.639 ± 0.062                                    | 17 cells from 6 mice  |                           |                       |

|                                    |                                                              |                |                       |                          |         |
|------------------------------------|--------------------------------------------------------------|----------------|-----------------------|--------------------------|---------|
| Adult awake PC frequency           | <i>Vglut2</i> <sup>fx/fx</sup>                               | 75 ± 6.21 Hz   | 18 cells from 7 mice  | 0.695                    | Fig. 4h |
|                                    | <i>Ptf1a</i> <sup>Cre</sup> ; <i>Vglut2</i> <sup>fx/fx</sup> | 72 ± 5.35 Hz   | 17 cells from 11 mice |                          |         |
| Adult awake PC CV                  | <i>Vglut2</i> <sup>fx/fx</sup>                               | 0.56 ± 0.05    | 18 cells from 7 mice  | 0.622                    | Fig. 4h |
|                                    | <i>Ptf1a</i> <sup>Cre</sup> ; <i>Vglut2</i> <sup>fx/fx</sup> | 0.60 ± 0.05    | 17 cells from 11 mice |                          |         |
| Adult awake PC CV2                 | <i>Vglut2</i> <sup>fx/fx</sup>                               | 0.45 ± 0.03    | 18 cells from 7 mice  | 0.204                    | Fig. 4h |
|                                    | <i>Ptf1a</i> <sup>Cre</sup> ; <i>Vglut2</i> <sup>fx/fx</sup> | 0.50 ± 0.02    | 17 cells from 11 mice |                          |         |
| P7 ML thickness                    | <i>Vglut2</i> <sup>fx/fx</sup>                               | 51 ± 1.2 μm    | 4 mice                | 2.3 × 10 <sup>-4</sup>   | Fig. 5  |
|                                    | <i>Ptf1a</i> <sup>Cre</sup> ; <i>Vglut2</i> <sup>fx/fx</sup> | 39 ± 1.5 μm    | 4 mice                |                          |         |
| Adult ML thickness                 | <i>Vglut2</i> <sup>fx/fx</sup>                               | 147.2 ± 2.5 μm | 5 mice                | 0.069                    | Fig. 5  |
|                                    | <i>Ptf1a</i> <sup>Cre</sup> ; <i>Vglut2</i> <sup>fx/fx</sup> | 145.6 ± 4.3 μm | 5 mice                |                          |         |
| Juvenile anesthetized CN frequency | <i>Vglut2</i> <sup>fx/fx</sup>                               | 3.11 ± 0.71 Hz | 8 cells from 3 mice   | 1.35 × 10 <sup>-2</sup>  | Fig. 6f |
|                                    | <i>Ptf1a</i> <sup>Cre</sup> ; <i>Vglut2</i> <sup>fx/fx</sup> | 14.9 ± 3.9 Hz  | 11 cells from 3 mice  |                          |         |
| Juvenile anesthetized CN CV        | <i>Vglut2</i> <sup>fx/fx</sup>                               | 2.25 ± 0.42    | 8 cells from 3 mice   | 0.98                     | Fig. 6f |
|                                    | <i>Ptf1a</i> <sup>Cre</sup> ; <i>Vglut2</i> <sup>fx/fx</sup> | 2.26 ± 0.65    | 11 cells from 3 mice  |                          |         |
| Juvenile anesthetized CN CV2       | <i>Vglut2</i> <sup>fx/fx</sup>                               | 0.86 ± 0.06    | 8 cells from 3 mice   | 0.053                    | Fig. 6f |
|                                    | <i>Ptf1a</i> <sup>Cre</sup> ; <i>Vglut2</i> <sup>fx/fx</sup> | 0.66 ± 0.07    | 11 cells from 3 mice  |                          |         |
| Adult awake CN frequency           | <i>Vglut2</i> <sup>fx/fx</sup>                               | 54 ± 4.4 Hz    | 33 cells from 14 mice | 3.594 × 10 <sup>-5</sup> | Fig. 6i |
|                                    | <i>Ptf1a</i> <sup>Cre</sup> ; <i>Vglut2</i> <sup>fx/fx</sup> | 28 ± 3.6 Hz    | 27 cells from 10 mice |                          |         |
| Adult awake CN CV                  | <i>Vglut2</i> <sup>fx/fx</sup>                               | 0.52 ± 0.04    | 33 cells from 14 mice | 5.6 × 10 <sup>-5</sup>   | Fig. 6i |
|                                    | <i>Ptf1a</i> <sup>Cre</sup> ; <i>Vglut2</i> <sup>fx/fx</sup> | 1.08 ± 0.12    | 27 cells from 10 mice |                          |         |
| Adult awake CN CV2                 | <i>Vglut2</i> <sup>fx/fx</sup>                               | 0.42 ± 0.03    | 33 cells from 14 mice | 6.56 × 10 <sup>-4</sup>  | Fig. 6i |
|                                    | <i>Ptf1a</i> <sup>Cre</sup> ; <i>Vglut2</i> <sup>fx/fx</sup> | 0.64 ± 0.05    | 27 cells from 10 mice |                          |         |

**Supplementary Table 1. Data for anatomical, behavioral and *in vivo* electrophysiological quantifications.**

A table containing data for the anatomical, behavioral and *in vivo* electrophysiological characterizations of *Ptfla*<sup>Cre</sup>; *Vglut2*<sup>fx/fx</sup> mutant mice compared to *Vglut2*<sup>fx/fx</sup> control mice. All p-values are from the unpaired Student's t-test. Abbreviations: ML = molecular layer, OFA = open field analysis, PC = Purkinje cell, CV = coefficient of variation of the ISIs, MLIs = molecular layer interneurons, CN = cerebellar nuclei.

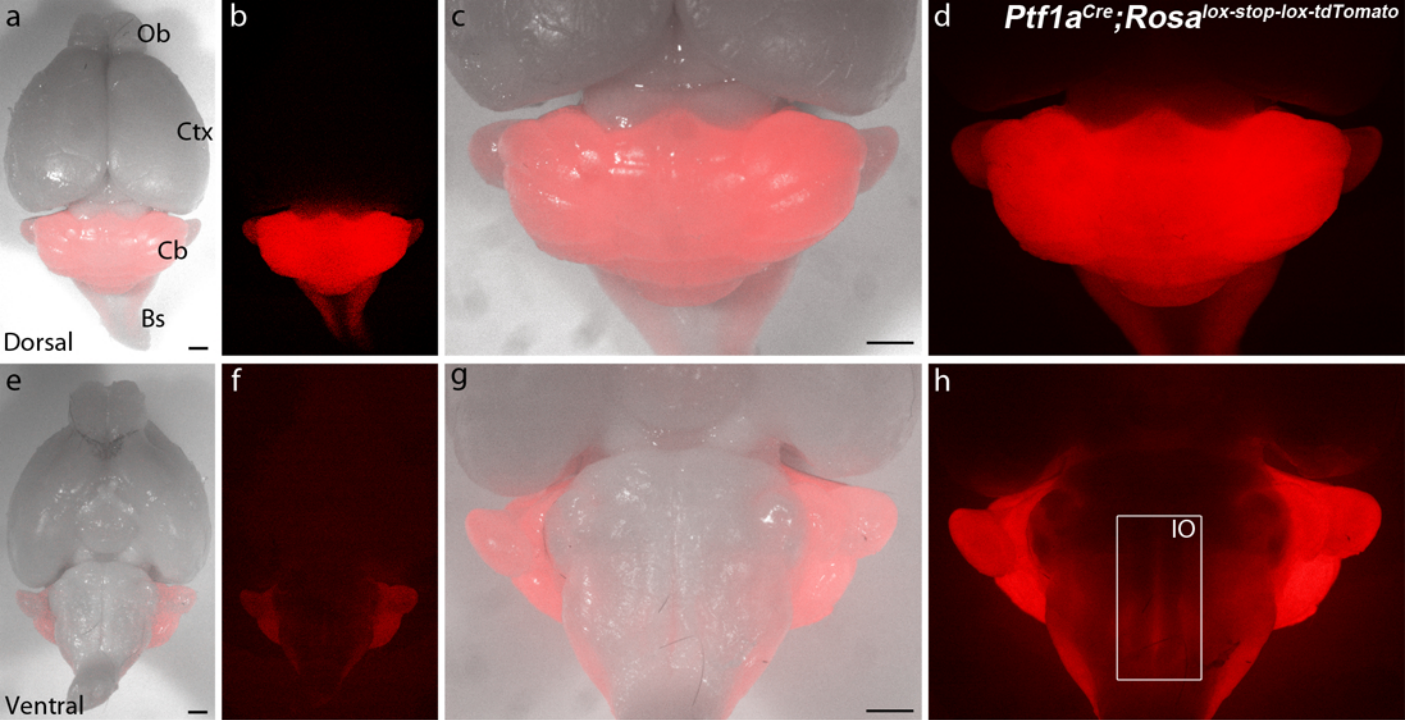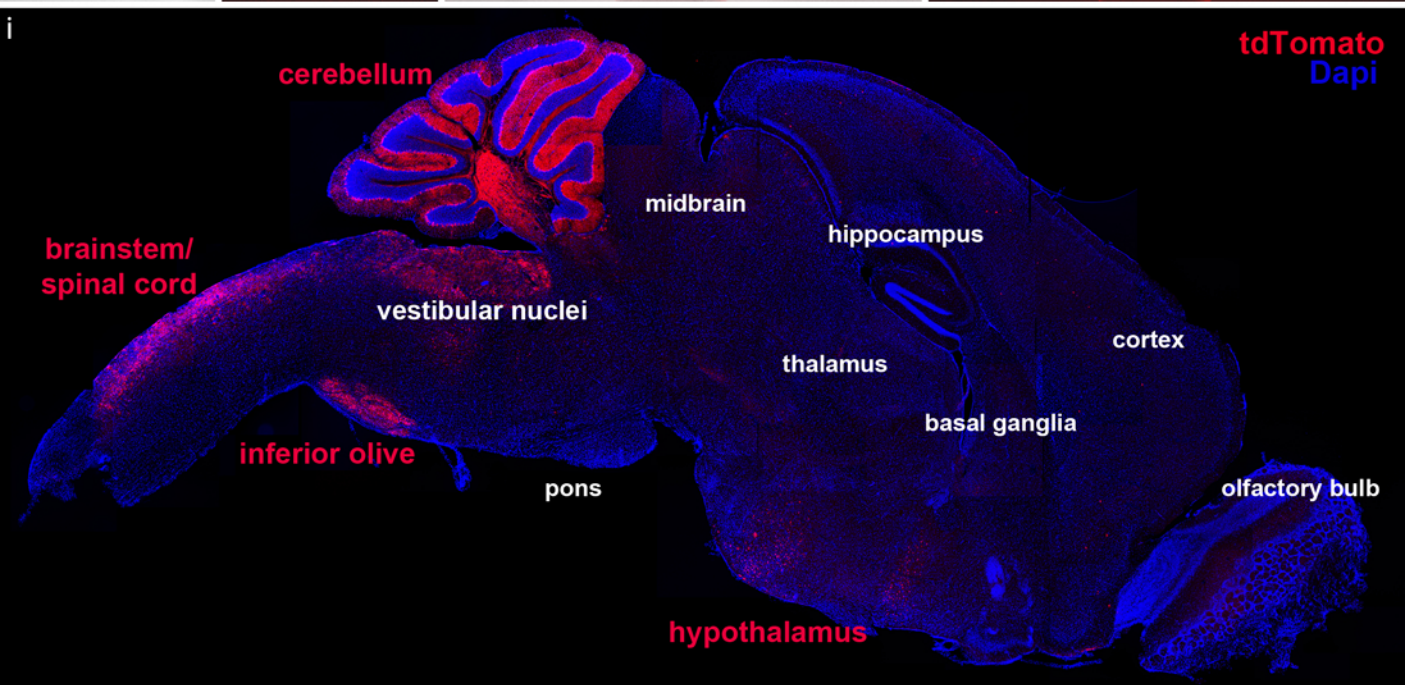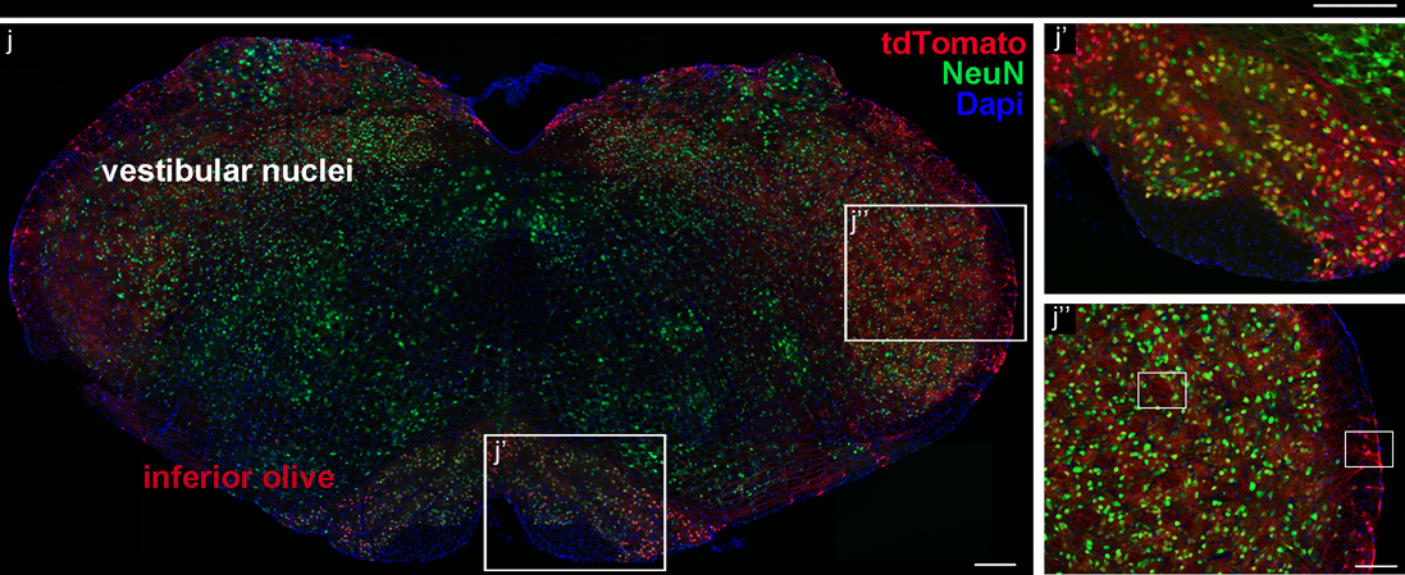



**Supplementary Figure 1. *Ptfla*<sup>Cre</sup> drives heavy tdTomato expression in the hindbrain circuitry.**

**(a-h)** Whole mount views of a *Ptfla*<sup>Cre</sup>;*Rosa*<sup>lox-stop-lox-tdTomato</sup> mouse brain with fluorescent images overlaid on bright field images in **(a, c, e, g)**. Abbreviations: Ob = olfactory bulb, Ctx = cortex, Cb = cerebellum, Bs = brainstem, IO = inferior olive. Scale bars = 1 mm.

**(i)** Shows a sagittal brain section that was assembled into a montage from higher power images from a *Ptfla*<sup>Cre</sup>;*Rosa*<sup>lox-stop-lox-tdTomato</sup> mouse. Areas with strong tdTomato labeling in somata are labeled in red, all other brain structures are labeled in white. Scale bar = 500  $\mu$ m.

**(j)** Brainstem section demonstrating overlap between *Ptfla-Cre* driven tdTomato expression and NeuN expression. Overlap in the somata is observed in the inferior olive, labeled in red in **(j)**, and higher power is shown in **(j')**, while other areas with tdTomato expression, such as adjacent to the vestibular nucleus (labeled with white letters in **(j)**), do not overlap with NeuN expression but are rather in non-neural cells (small box on right) and passing fibers (small box on left) as seen in **(j'')**. Scale bar in **j** = 200  $\mu$ m and scale bar in **j''** = 100  $\mu$ m.

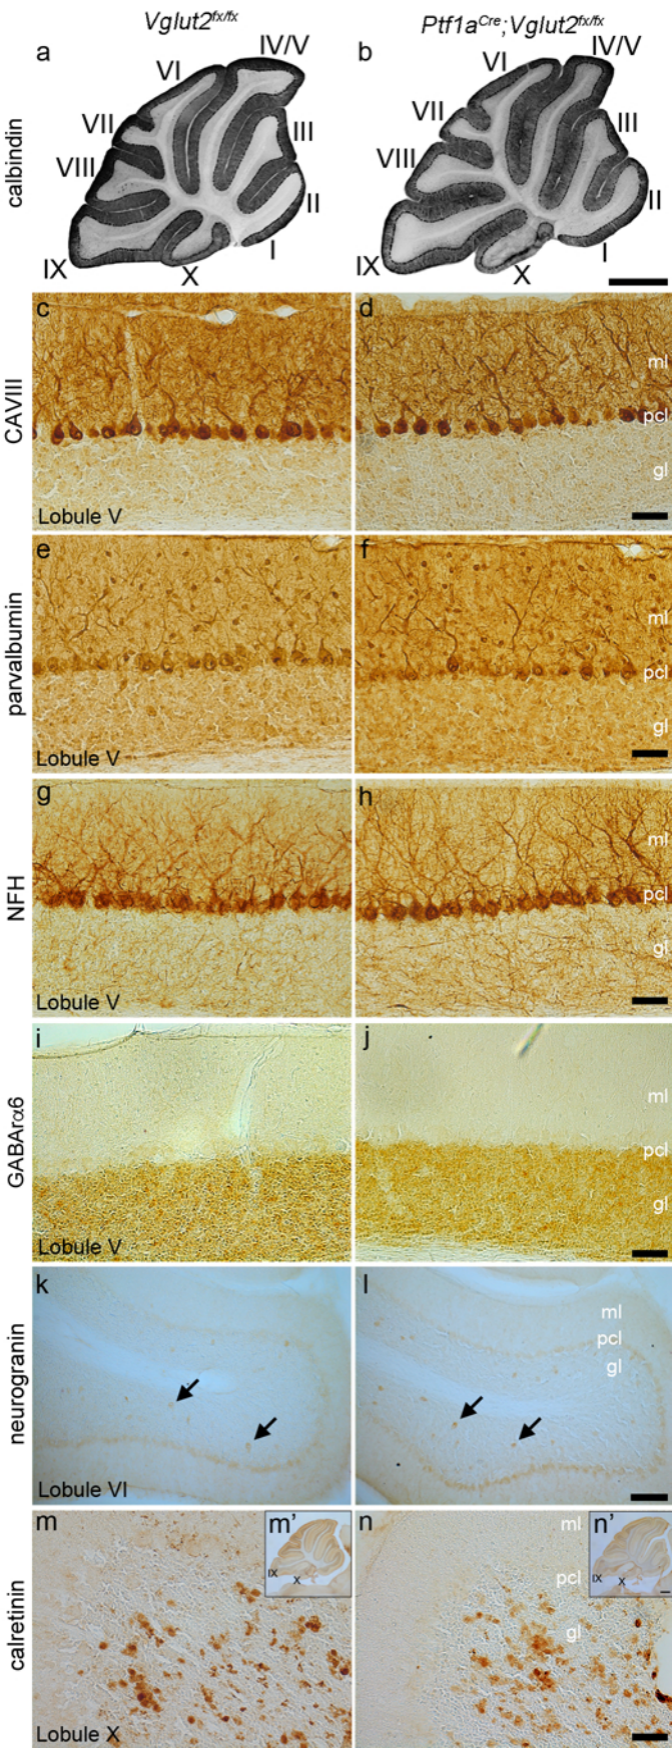

**Supplementary Figure 2. The molecular expression patterns of cellular markers and the size of the cerebellum are intact in the *Ptfla<sup>Cre</sup>;Vglut2<sup>fx/fx</sup>* mutant mice.**

**(a and b)** Foliation and size of the cerebellum are normal in *Ptfla<sup>Cre</sup>;Vglut2<sup>fx/fx</sup>* mice as compared to *Vglut2<sup>fx/fx</sup>* littermates. Scale bar = 2 mm.

**(c and d)** Purkinje cells are labeled by carbonic anhydrase VIII (CAVIII) and their position is normal in the adult cerebellum. Scale bar = 50  $\mu$ m.

**(e and f)** Expression of the GABAergic marker parvalbumin labels Purkinje cells and molecular layer interneurons with no difference between *Vglut2<sup>fx/fx</sup>* and *Ptfla<sup>Cre</sup>;Vglut2<sup>fx/fx</sup>* mice. Scale bar = 50  $\mu$ m.

**(g and h)** Neurofilament heavy (NFH) labels a subset of Purkinje cells and basket cell axons. The termination of basket cells axons on Purkinje cells is intact. Scale bar = 50  $\mu$ m.

**(i and j)** Expression of GABAalpha6, which labels differentiated granule cells in the granular layer, is normal. Scale bar = 50  $\mu$ m.

**(k and l)** Golgi cells heavily express neurogranin (arrows) and reside in the granular layer as normal. Scale bar = 100  $\mu$ m.

**(m and n)** Unipolar brush cells in lobule X express calretinin as normal. Scale bar = 50  $\mu$ m. In the *Ptfla<sup>Cre</sup>;Vglut2<sup>fx/fx</sup>* mutants, unipolar brush cells are restricted mainly to lobules IX and X as expected and are therefore not ectopically located beyond their typical circuit, **m'** and **n'**. Scale bar = 500  $\mu$ m. Abbreviations: ml = molecular layer, pcl = Purkinje cell layer, gl = granular layer.



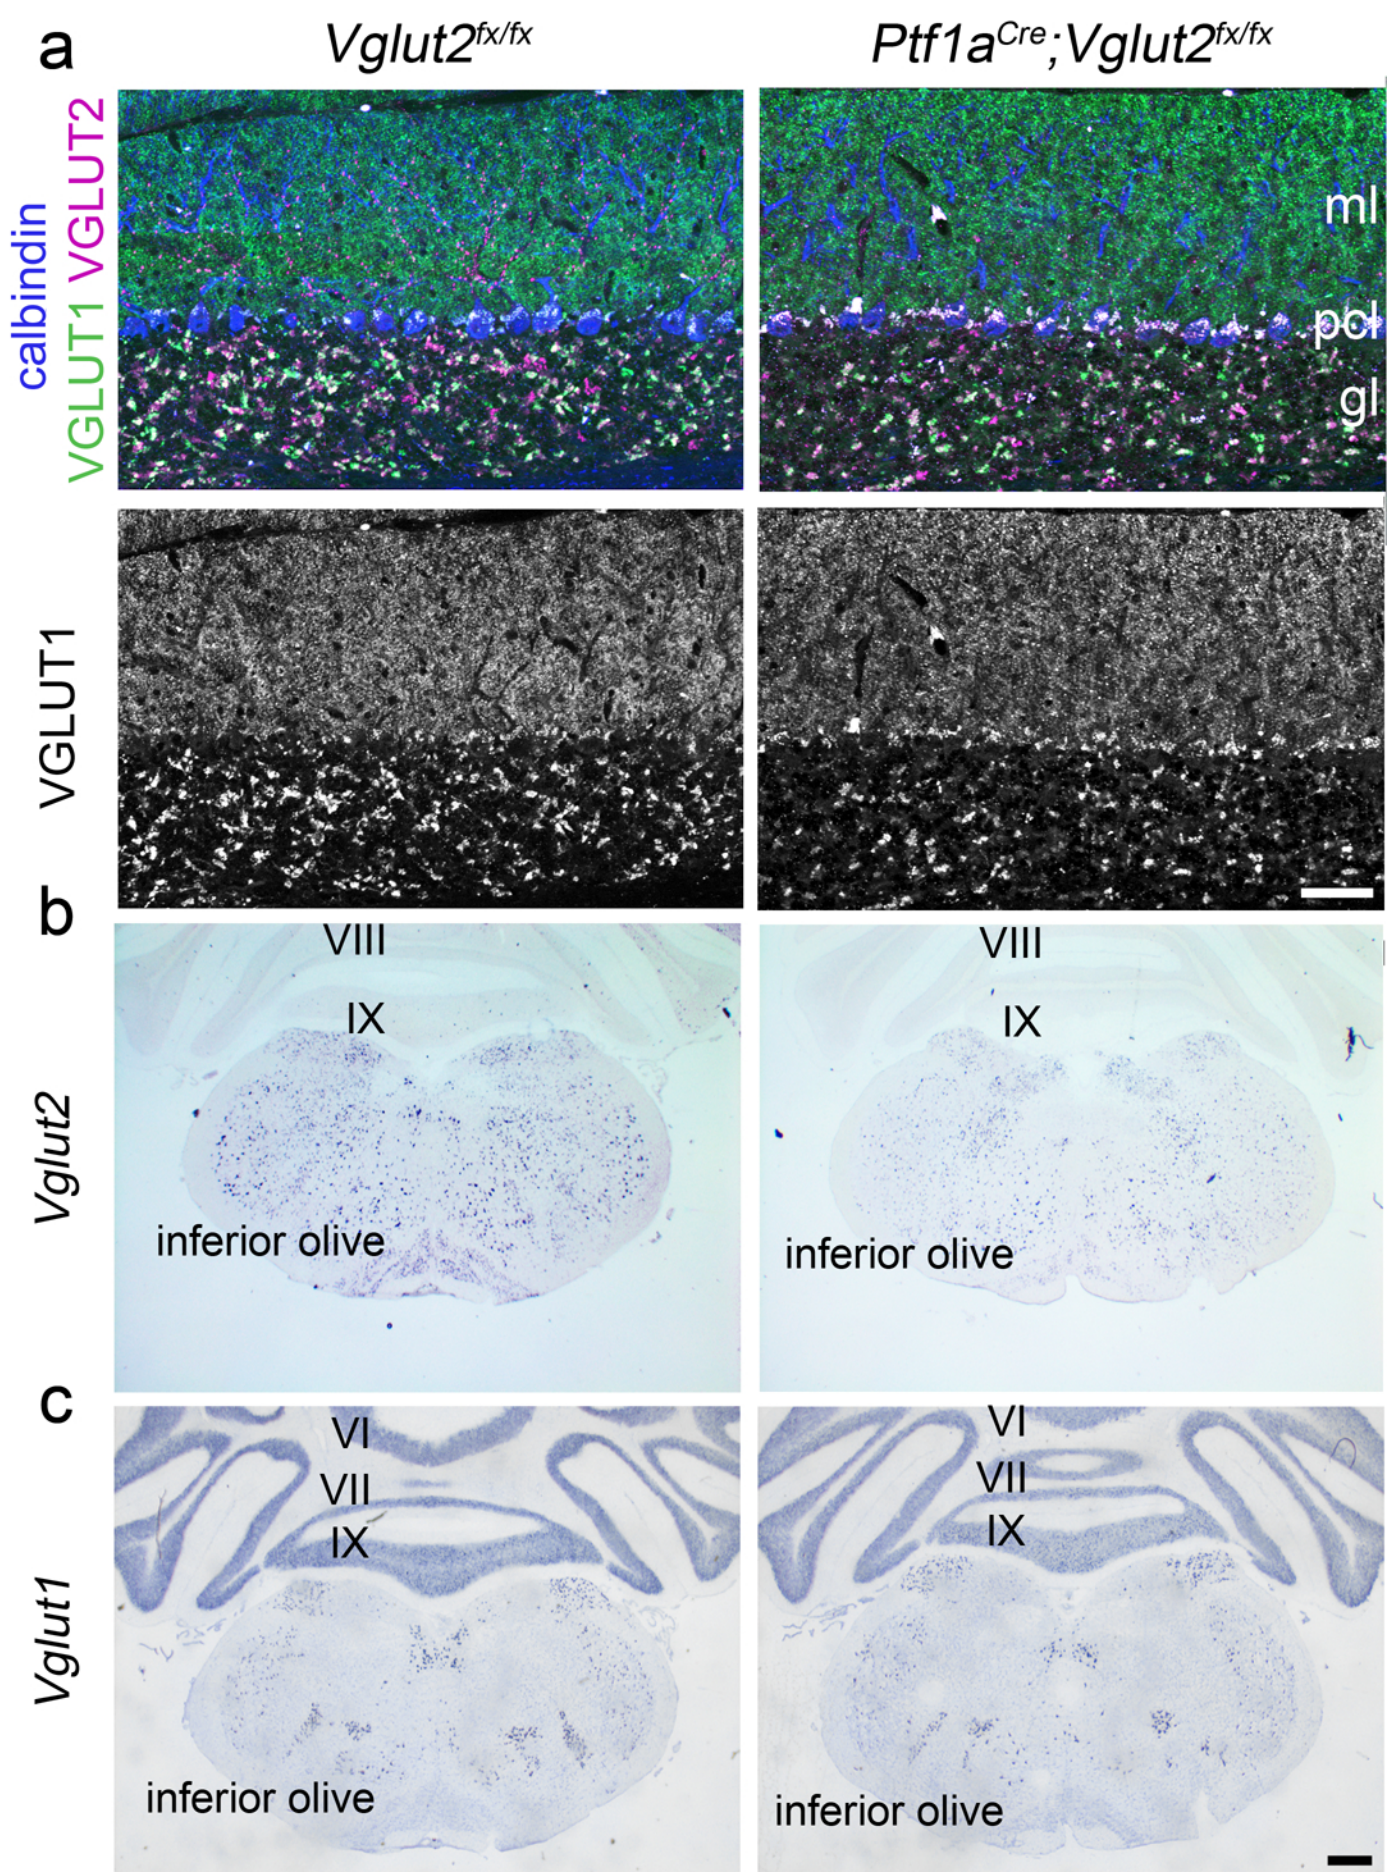



**Supplementary Figure 3. *Vglut1* does not compensate for the loss of *Vglut2* in the inferior olive.**

**(a)** Expression of VGLUT1, which is normally localized to parallel fiber terminals in the molecular layer, remained unchanged after the removal of VGLUT2 ( $p = 0.594$ ).  $n > 3$  mice per genotype.

Scale bar = 50  $\mu\text{m}$ .

**(b)** Genetic deletion of *Vglut2* as assessed by the depletion of mRNA in the inferior olive of the adult mutant mouse.

**(c)** *Vglut1* was not upregulated in the inferior olive after conditional deletion of *Vglut2*. Scale bar in **c** = 500  $\mu\text{m}$  (also applies to **b**). Abbreviations: ml = molecular layer, pcl = Purkinje cell layer, gl = granular layer.

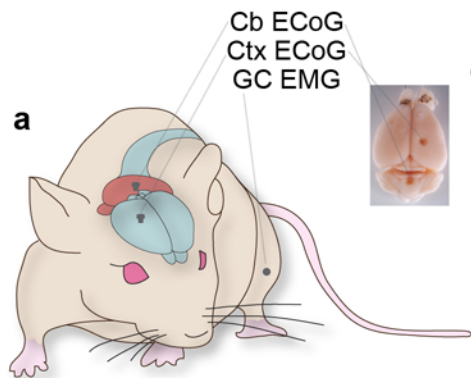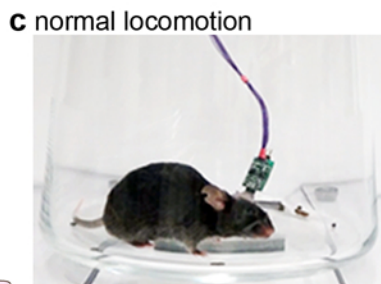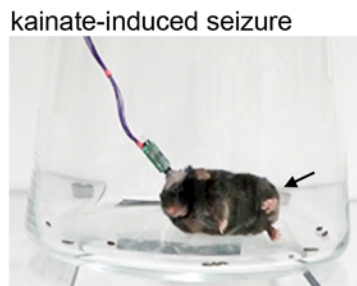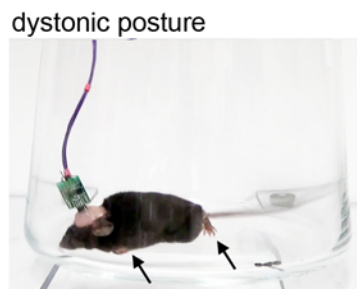

**d** *Vglut2<sup>fl/fl</sup>* - normal locomotion

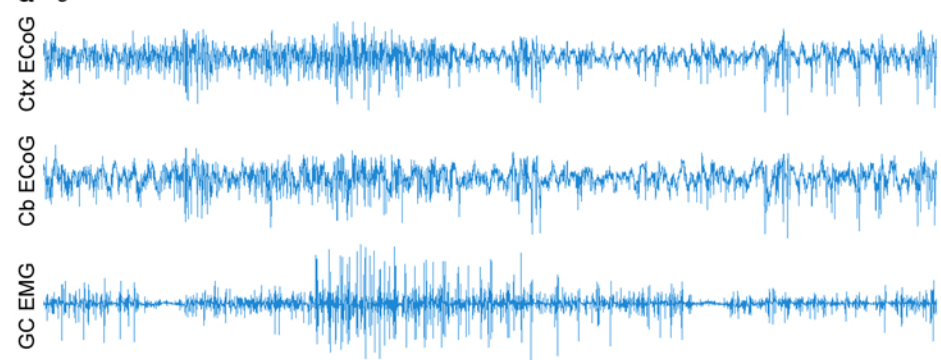

*Vglut2<sup>fl/fl</sup>* - kainate-induced seizure

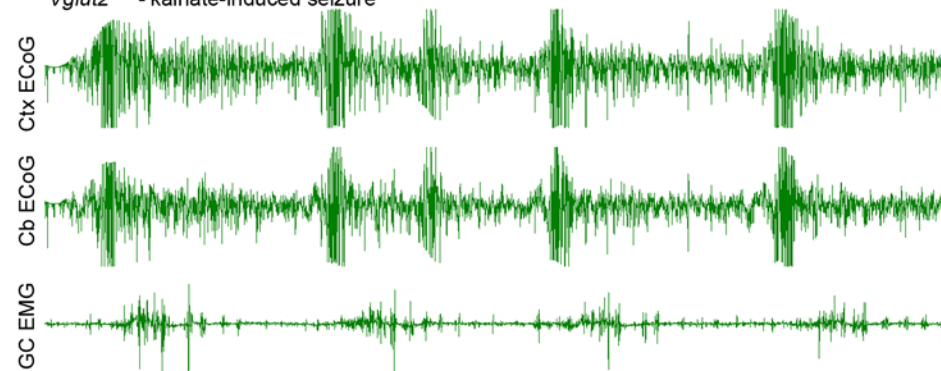

*Ptf1a<sup>Cre</sup>;Vglut2<sup>fl/fl</sup>* - dystonic postures

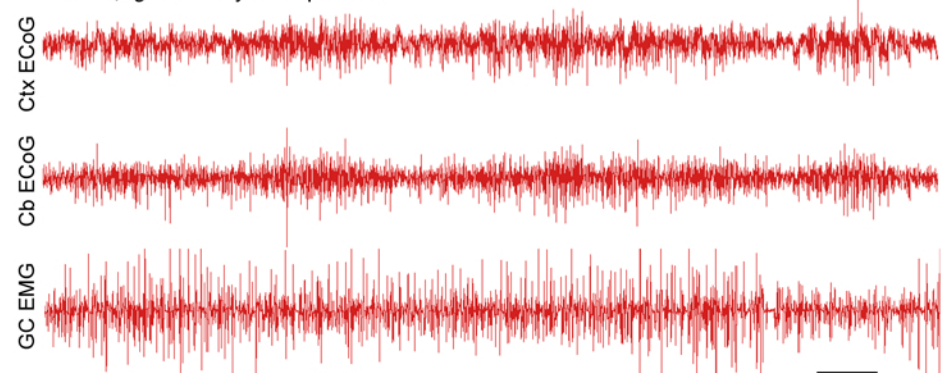

100 ms

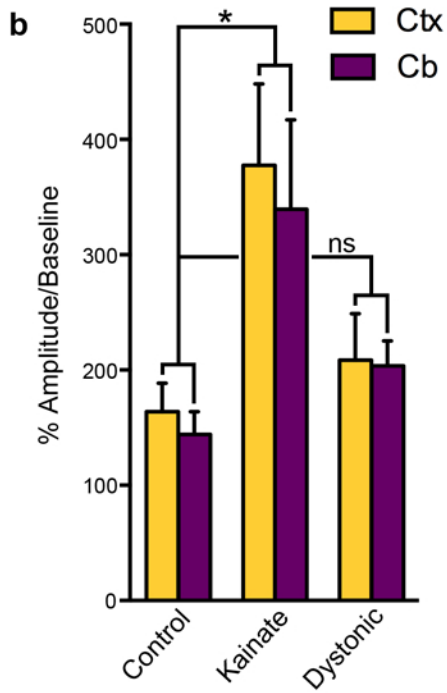

**Supplementary Figure 4. Loss of neurotransmission from the inferior olive to the cerebellum does not cause seizure-like activity.**

- (a)** Schematic example of recording sites for ECoG and EMG electrodes as well as a brain image showing localization of ECoG electrodes. Schematic adapted with permission, from drawings published in ref. 74.
- (b)** Quantification of amplitude of the ECoG signal normalized to baseline. While a significant difference was found between kainate-induced seizure and normal locomotion (during exploratory behavior) (ctx:  $p = 0.0184$ , cb:  $p = 0.0187$ ), no significant difference was found between control, normal locomotion and the dystonic *Ptfla*<sup>Cre</sup>; *Vglut2*<sup>fx/fx</sup> mice (ctx:  $p = 0.4047$ ,  $p = \text{cb: } 0.0892$ ).  $n = 5$  mice in all conditions. Student's unpaired t-test.
- (c)** Still images of mice in each condition. Arrows point to abnormal postures.
- (d)** Sample ECoG and EMG traces from each condition. Scale bar = 100 ms.

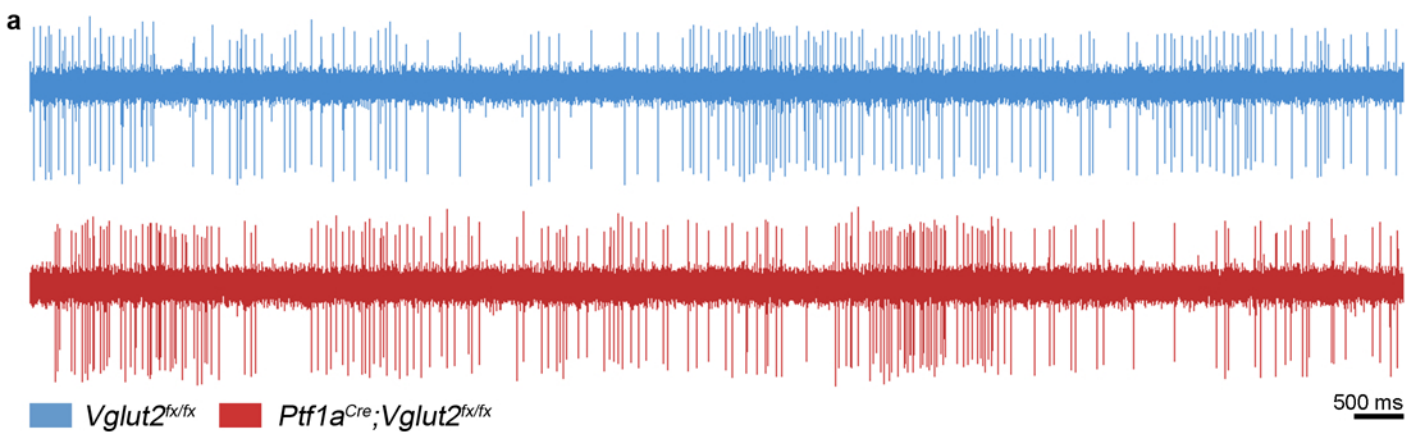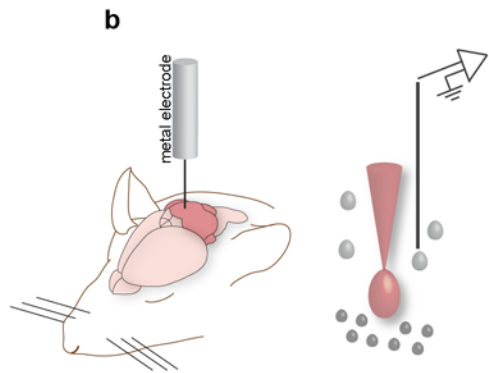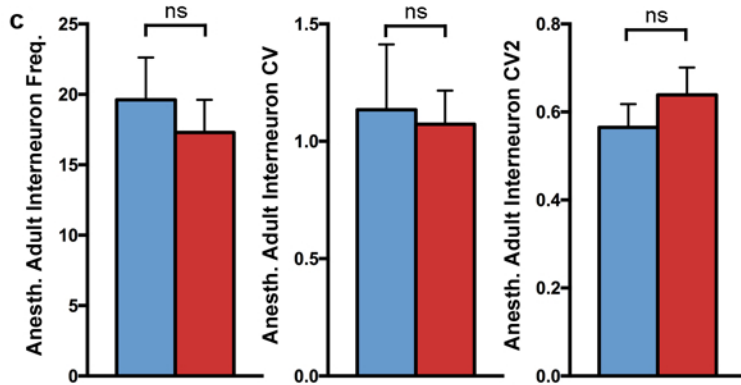



**Supplementary Figure 5. Loss of olivocerebellar signaling does not affect the firing properties of cerebellar cortical interneurons.**

- (a) Single-unit extracellular recordings of putative stellate and basket cell inhibitory interneurons from superficial aspects of the cerebellum (no deeper than 1.5 mm) accessed from a craniotomy made over lobule VI in anesthetized mice. The recordings reveal very similar firing characteristics between interneurons of *Vglut2<sup>fx/fx</sup>* (top) and *Ptfla<sup>Cre</sup>;Vglut2<sup>fx/fx</sup>* (bottom) mice. Scale bar = 500 ms.
- (b) Schematic of the anesthetized cerebellar recording and electrode proximity to inhibitory interneurons in the molecular layer of the cerebellar cortex. Schematic adapted with permission, from drawings published in ref. 28 and 74.
- (c) Firing properties were not significantly different between interneurons in *Vglut2<sup>fx/fx</sup>* and *Ptfla<sup>Cre</sup>;Vglut2<sup>fx/fx</sup>* mice ( $n = 11$  cells from 5 animals and 17 cells from 6 animals, respectively) (Frequency:  $p = 0.545$ ; CV:  $p = 0.846$ ; CV2:  $p = 0.376$ ). Error bars are defined as s.e.m. Student's unpaired t-test.

*Vglut2*<sup>fx/fx</sup>

*Ptf1a*<sup>Cre</sup>;*Vglut2*<sup>fx/fx</sup>

Anterior

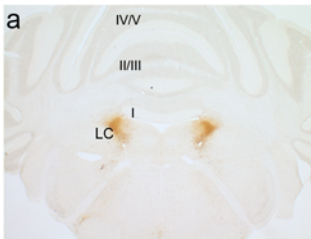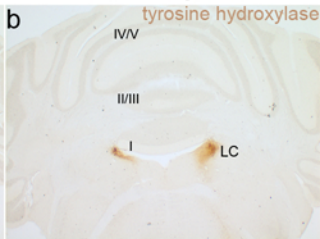

Posterior

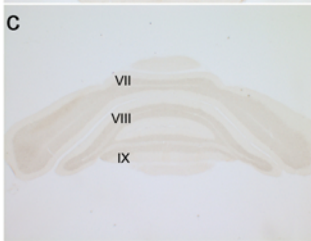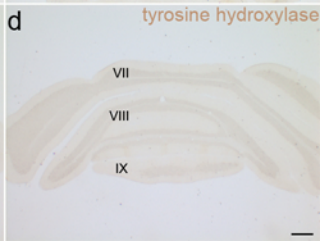

**Supplementary Figure 6. Tyrosine Hydroxylase is not upregulated in *Ptf1a<sup>Cre</sup>;Vglut2<sup>fx/fx</sup>* mutant mice.**

**(a - d)** Tyrosine hydroxylase (TH) is often expressed ectopically in the Purkinje cells of adult mutant mice with altered cerebellar function<sup>28</sup>. TH expression is not upregulated in the adult *Ptf1a<sup>Cre</sup>;Vglut2<sup>fx/fx</sup>* mutant mouse cerebellum in either anterior (shown: lobules I, II/III, IV/V) or posterior sections (shown: lobules VII, VIII, IX). TH expression in the locus coeruleus (LC) was not changed in *Ptf1a<sup>Cre</sup>;Vglut2<sup>fx/fx</sup>* mice.  $n > 4$  mice per genotype. Scale bar = 500  $\mu\text{m}$ .

*Vglut2<sup>fx/fx</sup>*

*Ptf1a<sup>Cre</sup>;Vglut2<sup>fx/fx</sup>*

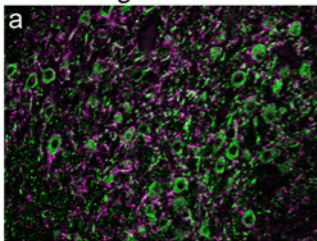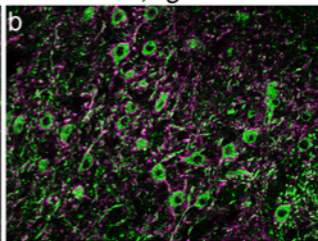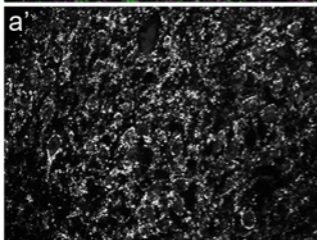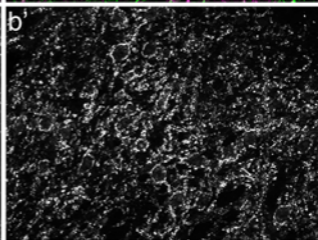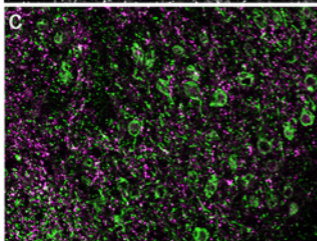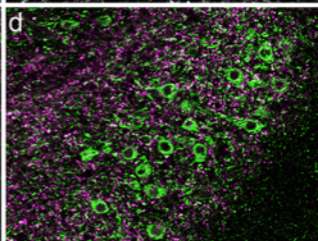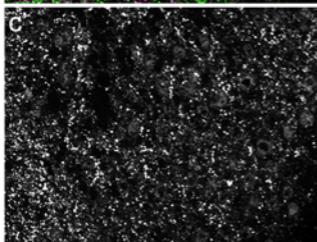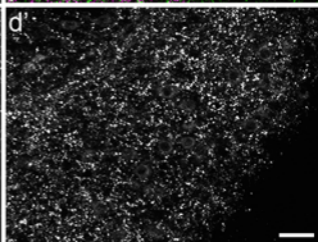



**Supplementary Figure 7. There was no significant difference in VGAT and a minor difference in VGLUT2 expression in the cerebellar nuclei after loss of VGLUT2 in axon terminals that project from the inferior olive.**

**(a, a', b and b')** Analysis of VGAT expression in the cerebellar nuclei of *Vglut2<sup>fx/fx</sup>*, compared to *Ptfla<sup>Cre</sup>;Vglut2<sup>fx/fx</sup>* mice, revealed similar numbers of puncta between the genotypes (*Vglut2<sup>fx/fx</sup>* =  $3480 \pm 90.5$ ,  $n = 4$ ; *Ptfla<sup>Cre</sup>;Vglut2<sup>fx/fx</sup>* =  $3500 \pm 140.7$ ,  $n = 7$ ;  $p = 0.765$ ; Student's unpaired t-test).

**(c, c', d, and d')** Analysis of VGLUT2 expression in the cerebellar nuclei of *Vglut2<sup>fx/fx</sup>* mice, compared to *Ptfla<sup>Cre</sup>;Vglut2<sup>fx/fx</sup>* mice, revealed a small, but significant decrease in the number of puncta between the genotypes, likely representing the loss of VGLUT2 in the olivocerebellar collaterals that project to the cerebellar nuclei (*Vglut2<sup>fx/fx</sup>* =  $3300 \pm 120.5$ ,  $n = 5$ ; *Ptfla<sup>Cre</sup>;Vglut2<sup>fx/fx</sup>* =  $2800 \pm 173.1$ ;  $p = 0.0229$ ,  $n = 6$ , Student's unpaired t-test). Scale bar = 50  $\mu\text{m}$ .

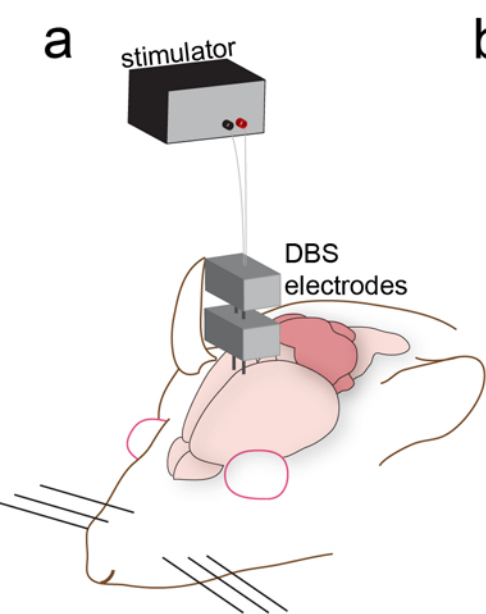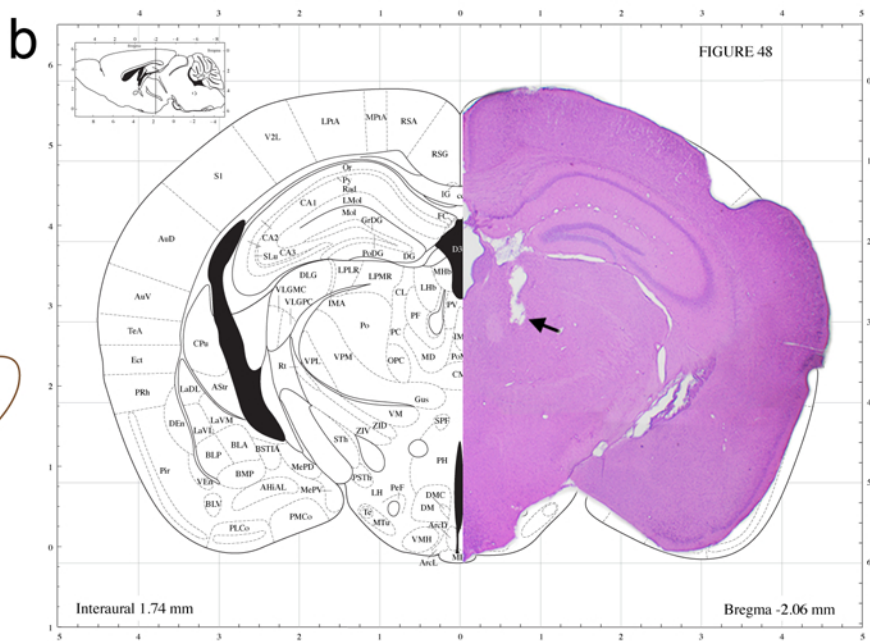

**c** Pre-DBS

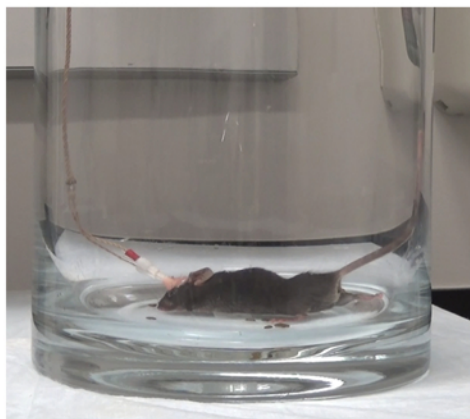

During DBS

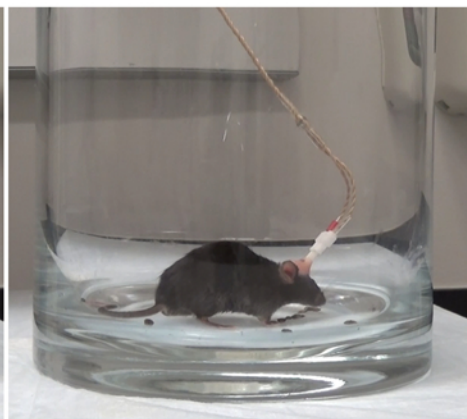

**d** DBS Effects

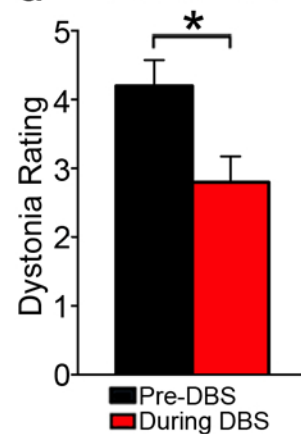

**Supplementary Figure 8. Deep brain stimulation (DBS) of the centrolateral nuclei of the thalamus recovers motor function in *Ptf1a<sup>Cre</sup>;Vglut2<sup>fx/fx</sup>* mice.**

- (a) A schematic example of deep brain stimulation targeting the thalamus. Schematic adapted with permission, from drawings published in ref. 28.
- (b) Histological confirmation of targeting the DBS electrodes to the centrolateral nuclei (arrow). Schematic reproduced in part, with permission, from Paxinos, G. & Franklin, K. B. J. *The Mouse Brain in Stereotaxic Coordinates* (2004).
- (c) Stills of a *Ptf1a<sup>Cre</sup>;Vglut2<sup>fx/fx</sup>* mouse before and during stimulation.
- (d) Dystonia rating before and during DBS stimulation of the centrolateral thalamic nuclei in naïve *Ptf1a<sup>Cre</sup>;Vglut2<sup>fx/fx</sup>* mutant mice ( $p = 0.0249$ ,  $n = 5$  mice, Student's paired t-test). Error bars are defined as s.e.m.
